# Supplementary material for: Achieving Excellent Dielectric and Energy Storage Performance in Core-Double-Shell-Structured Polyetherimide Nanocomposites
Source: MDPI journal article supplement (doi:10.3390/polym15143088), 2023-07-19
Supplement: s1 [file s1]

# Achieving Excellent Dielectric and Energy Storage Performance in Core-Double-Shell-Structured Polyetherimide Nanocomposites

You Yuan, Jingyu Lin, Xinhua Wang, Jun Qian \*, Peiyuan Zuo and Qixin Zhuang \*

Key Laboratory of Specially Functional Polymeric Materials and Related Technology (Ministry of Education), School of Material Science and Engineering, East China University of Science and Technology, Shanghai 200237, China

\* Correspondence: qianjun@ecust.edu.cn (J.Q.); qxzhuang@ecust.edu.cn (Q.Z.)

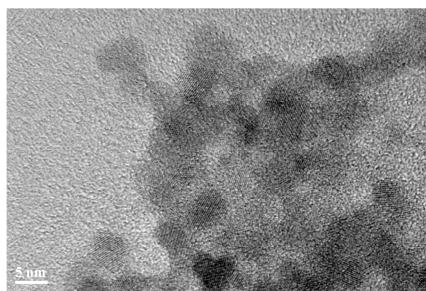

**Figure S1.** Experimental synthesis process of the core-double-shell structured  $\text{Fe}_3\text{O}_4@\text{BaTiO}_3@\text{SiO}_2$  nanospheres.

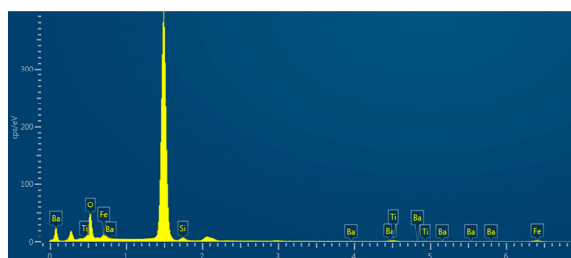

**Figure S2** Element detection report from the EDS analysis conducted on  $\text{Fe}_3\text{O}_4@\text{BaTiO}_3@\text{SiO}_2$  nanoparticles.

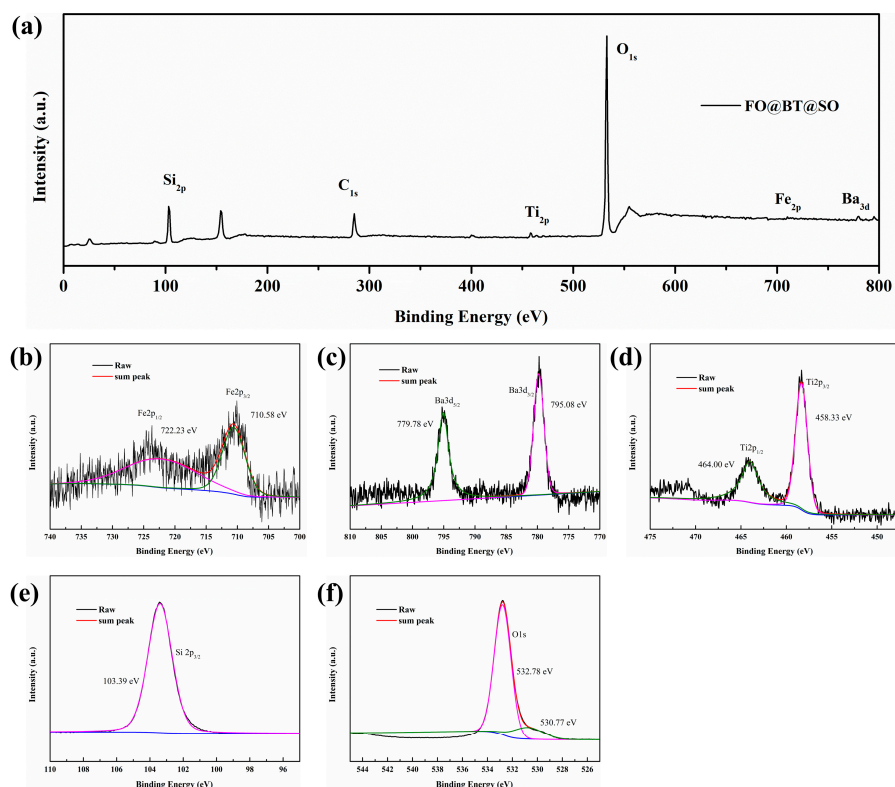

**Figure S3** (a) Full XPS Spectrum of  $\text{Fe}_3\text{O}_4@\text{BaTiO}_3@\text{SiO}_2$ ; (b), (c), (d), (e), (f) XPS Single Spectra of Fe2p, Ba3d, Ti2p, Si2p, and O1s regions, respectively.

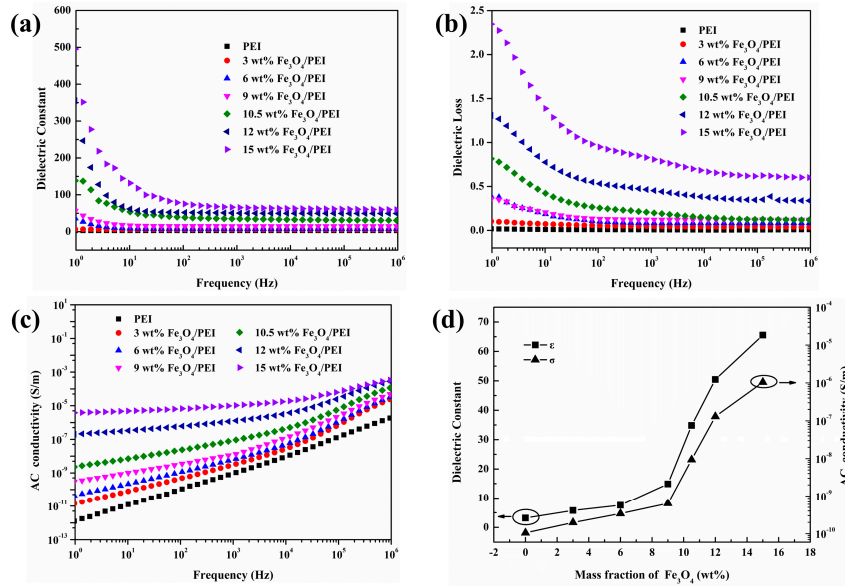

**Figure S4** Frequency dependent (a) dielectric constant (b) dissipation factor and (c) AC conductivity of the Fe<sub>3</sub>O<sub>4</sub>/PEI nanocomposites. (d) Variation of dielectric constant and conductivity of Fe<sub>3</sub>O<sub>4</sub>/PEI composite films with filler content.

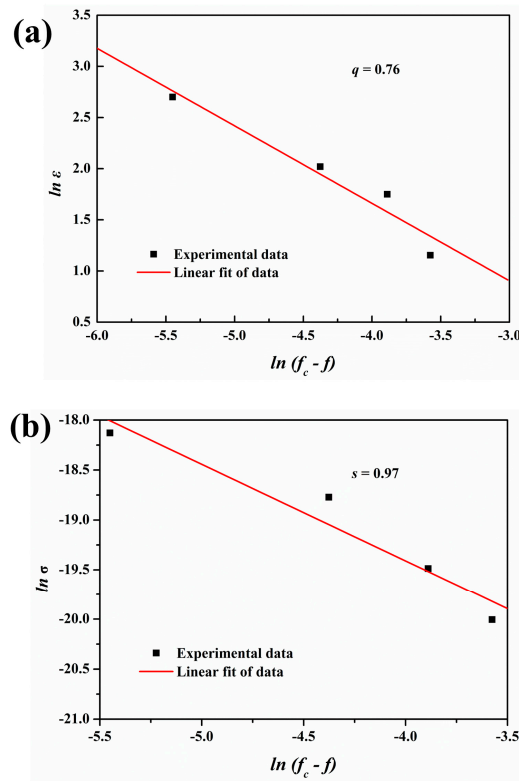

**Figure S5** Linear Fit of (a) dielectric constant and (b) AC conductivity for Fe<sub>3</sub>O<sub>4</sub>/PEI nanocomposites ( $f \leq f_c$ ).

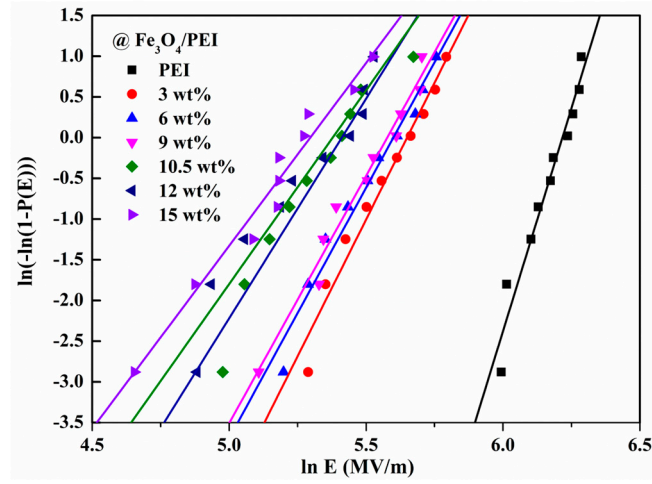

**Figure S6** Weibull distribution of the  $\text{Fe}_3\text{O}_4/\text{PEI}$  nanocomposites with different filler loadings.

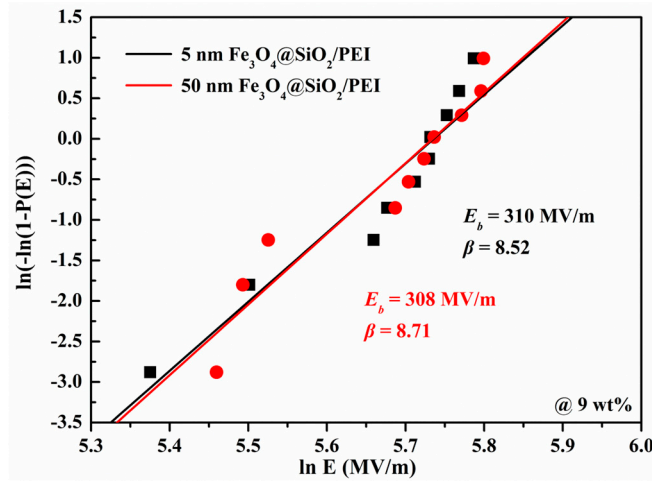

**Figure S7** Weibull distribution plots of  $\text{Fe}_3\text{O}_4@\text{SiO}_2/\text{PEI}$  nanocomposite films with  $\text{SiO}_2$  shell thicknesses of 5 nm and 50 nm, respectively.

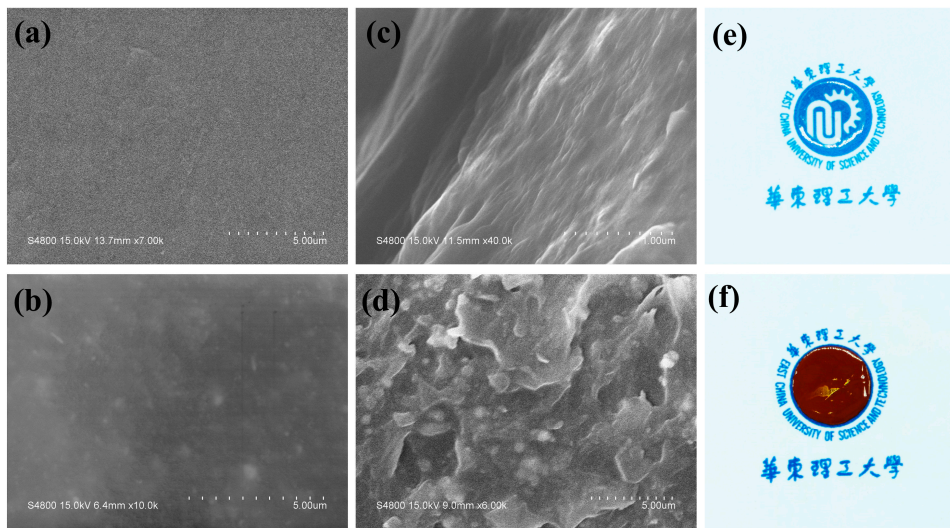

**Figure S8** (a, b) Surface SEM images (c, d) cross-section SEM and (e, f) optical photos (focusing on the circular region in the middle) of the pristine PEI film and the 9 wt%  $\text{Fe}_3\text{O}_4@\text{BaTiO}_3@\text{SiO}_2/\text{PEI}$

nanocomposite film, respectively. (The Chinese part represents the affiliation of the authors: East China University of Science and Technology.)

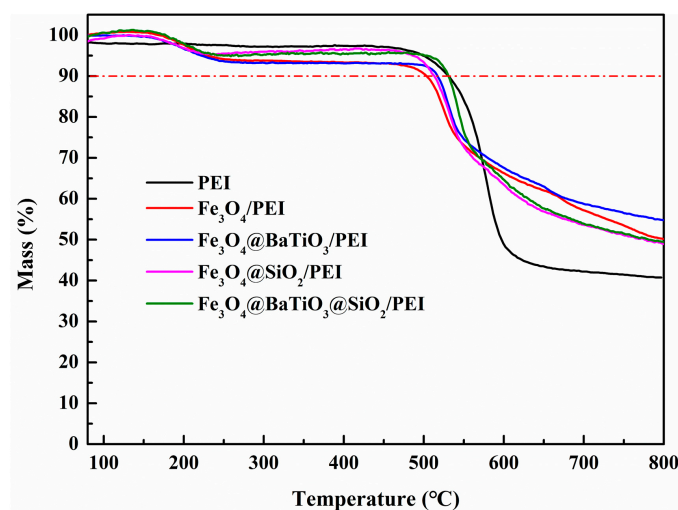

**Figure S9** Thermogravimetric curves of PEI and its nanocomposite films.

**Table S1.** Performance parameters of dielectric composites have been reported in recent years in relation to this subject.

| Filler                                                               | Matrix     | Filler Content | Dielectric Loss | Discharged energy density | Test condition | Operating temperature | Ref.      |
|----------------------------------------------------------------------|------------|----------------|-----------------|---------------------------|----------------|-----------------------|-----------|
| Fe <sub>3</sub> O <sub>4</sub> @BaTiO <sub>3</sub> @SiO <sub>2</sub> | PEI        | 9 wt%          | 0.015           | 5.82                      | 1 kHz          | 100 °C                | This work |
| Fe <sub>3</sub> O <sub>4</sub>                                       | PEI        | 9 wt%          | 0.12            | 4.83                      | 1 kHz          | 50 °C                 | This work |
| Fe <sub>3</sub> O <sub>4</sub> @C@PAN I                              | PBO        | 12 wt%         | 0.047           |                           | 1 kHz          | Room temperature      | [1]       |
| FO@BTO                                                               | P(VDF-HFP) | 10 wt%         | 0.05            | 7.018                     | 100 Hz         | Room temperature      | [2]       |
| BT-Fe <sub>3</sub> O <sub>4</sub>                                    | PVDF       | 40 vol%        | 0.24            |                           | 100 Hz         | Room temperature      | [3]       |
| Fe <sub>3</sub> O <sub>4</sub> /MWNT-S                               | PVDF       | 0.17 vol%      | 0.5             |                           | 1 kHz          | Room temperature      | [4]       |
| C@BT@R-PANI                                                          | PEI        | 3 vol%         | 0.009           | 2.46                      | 1 kHz          | 150 °C                | [5]       |

## References

1. Liu, Q.; Cheng, Z.; Qian, J.; Chen, X.; Zhang, Y.; Zhuang, Q. A core@double shell-structured PBO composite with excellent dielectric properties and high heat resistance. *Journal of Materials Chemistry A* 2019, 7, 11195-11204, doi:10.1039/c8ta11796a.
2. Zhou, L.; Fu, Q.; Xue, F.; Tang, X.; Zhou, D.; Tian, Y.; Wang, G.; Wang, C.; Gou, H.; Xu, L. Multiple Interfacial Fe<sub>3</sub>O<sub>4</sub>@BaTiO<sub>3</sub>/P(VDF-HFP) Core-Shell-Matrix Films with Internal Barrier Layer Capacitor (IBLC) Effects and High Energy Storage Density. *ACS Appl. Mater. Interfaces* 2017, 9, 40792-40800, doi:10.1021/acsami.7b10923.

3. Zhang, C.; Chi, Q.; Dong, J.; Cui, Y.; Wang, X.; Liu, L.; Lei, Q. Enhanced dielectric properties of poly(vinylidene fluoride) composites filled with nano iron oxide-deposited barium titanate hybrid particles. *Scientific Reports* 2016, 6, doi:10.1038/srep33508.
4. Wang, H.; Fu, Q.; Luo, J.; Zhao, D.; Luo, L.; Li, W. Three-phase  $\text{Fe}_3\text{O}_4$ /MWNT/PVDF nanocomposites with high dielectric constant for embedded capacitor. *Applied Physics Letters* 2017, 110, doi:10.1063/1.4986443.
5. Ni, X.; Wang, X.; Lin, J.; Liu, X.; Cui, Z.-K.; Zuo, P.; Zhuang, Q. Ultra-low dielectric loss and high thermal stability achieved by hierarchical microcapacitor structure in nanocomposites via surface topological modulation. *Materials Today Energy* 2023, 31, doi:10.1016/j.mtener.2022.101221.
